# Supplementary material for: Effectiveness and tolerability of brivaracetam in patients with epilepsy stratified by comorbidities and etiology in the real world: 12-month subgroup data from the international EXPERIENCE pooled analysis
Source: PubMed Central journal article supplement (PMC11136785; doi:10.1007/s00415-024-12253-z), 2024-03-04

## Supplementary material

### Effectiveness and tolerability of brivaracetam in patients with epilepsy stratified by comorbidities and etiology in the real world: 12-month subgroup data from the international EXPERIENCE pooled analysis

Journal: *Journal of Neurology*

Jerzy P. Szaflarski<sup>1</sup> • Hervé Besson<sup>2</sup> • Wendyl D'Souza<sup>3</sup> • Edward Faught<sup>4</sup> • Pavel Klein<sup>5</sup> • Markus Reuber<sup>6</sup> • Felix Rosenow<sup>7,8</sup> • Javier Salas-Puig<sup>9</sup> • Victor Soto Insuga<sup>10</sup> • Bernhard J. Steinhoff<sup>11</sup> • Adam Strzelczyk<sup>7,8</sup> • Dimitrios Bourikas<sup>12</sup> • Tony Daniels<sup>13</sup> • Florin Floricel<sup>14</sup> • David Friesen<sup>15</sup> • Cédric Laloyaux<sup>16</sup> • Vicente Villanueva<sup>17</sup>

- <sup>1</sup> University of Alabama at Birmingham (UAB) Heersink School of Medicine Department of Neurology and UAB Epilepsy Center, Birmingham, AL, USA
- <sup>2</sup> UCB Pharma, Breda, Netherlands
- <sup>3</sup> Department of Medicine, St Vincent's Hospital Melbourne, The University of Melbourne, Melbourne, VIC, Australia
- <sup>4</sup> Emory Epilepsy Center, Atlanta, GA, USA
- <sup>5</sup> Mid-Atlantic Epilepsy and Sleep Center, Bethesda, MD, USA
- <sup>6</sup> The University of Sheffield, Sheffield, UK
- <sup>7</sup> Epilepsy Center Frankfurt Rhine-Main, Department of Neurology, Goethe University Frankfurt, Frankfurt, Germany
- <sup>8</sup> LOEWE Center for Personalized Translational Epilepsy Research (CePTER), Goethe University Frankfurt, Frankfurt, Germany
- <sup>9</sup> Universitari Vall d'Hebron, Barcelona, Spain
- <sup>10</sup> Pediatric Neurology, Hospital Universitario Infantil Niño Jesús, Madrid, Spain
- <sup>11</sup> Kork Epilepsy Center, Kehl-Kork and Medical Faculty, University of Freiburg, Freiburg, Germany
- <sup>12</sup> UCB Pharma, Alimos, Greece
- <sup>13</sup> UCB Pharma, Morrisville, NC, USA
- <sup>14</sup> UCB Pharma, Monheim am Rhein, Germany
- <sup>15</sup> UCB Pharma, Slough, England, UK
- <sup>16</sup> UCB Pharma, Brussels, Belgium
- <sup>17</sup> Refractory Epilepsy Unit, Hospital Universitario y Politécnico La Fe, EpiCARE member, Valencia, Spain

Corresponding author: Jerzy P. Szaflarski, University of Alabama at Birmingham (UAB) Heersink School of Medicine Department of Neurology and UAB Epilepsy Center, Birmingham, AL, USA

e-mail address: [jszaflarski@uabmc.edu](mailto:jszaflarski@uabmc.edu)

**Supplementary Appendix S1** Patients with focal-onset seizures who were on a BRV dose of  $\leq 200$  mg/day used as add-on at index

Among patients with focal-onset seizures at baseline and a brivaracetam (BRV) dose of  $\leq 200$  mg/day used as add-on at index, baseline demographics and epilepsy characteristics in each of the comorbidity and etiology subgroups were similar to those observed in the wider subgroup populations (Table 1 and Supplementary Table S2).

Subgroup analyses by cognitive/learning disability (CLD) comorbidity showed that, during the whole study follow-up, 37.1% ( $n = 356$ ) of patients with and 32.4% ( $n = 1074$ ) of patients without CLD discontinued BRV. Effectiveness assessments at 12 months showed  $\geq 50\%$  seizure reduction was achieved in 36.9% and 38.6% of patients with and without CLD, respectively (modified full analysis set [mFAS]) (Supplementary Fig. S2a); seizure freedom was achieved in 8.0% and 17.4% (full analysis set [FAS]) (Supplementary Fig. S2b); continuous seizure freedom was achieved in 5.5% and 13.8% (Supplementary Fig. S2c); and BRV retention was achieved in 66.7% and 72.8% (Supplementary Fig. S2d). At 12 months, treatment-emergent adverse events (TEAEs) since prior visit were reported in 11.9% and 9.1% of patients with and without CLD, respectively (Supplementary Table S3).

Subgroup analyses by psychiatric comorbidity showed that, during the whole study follow-up, 31.3% ( $n = 531$ ) of patients with and 34.7% ( $n = 885$ ) of patients without psychiatric comorbidity discontinued BRV. At 12 months,  $\geq 50\%$  seizure reduction was achieved in 39.0% and 37.8% of patients with and without psychiatric comorbidity, respectively (mFAS) (Supplementary Fig. S2a); seizure freedom was achieved in 15.1% and 14.2% (FAS) (Supplementary Fig. S2b); continuous seizure freedom was achieved in 12.7% and 10.4% (Supplementary Fig. S2c); and BRV retention was achieved in 71.9% and 71.3% (Supplementary Fig. S2d). TEAEs since prior visit at 12 months were reported in 10.2% and 9.5% of patients with and without psychiatric comorbidity, respectively (Supplementary Table S3).

Subgroup analyses by post-stroke epilepsy status showed that, during the whole study follow-up, 34.7% ( $n = 49$ ) of patients with and 33.5% ( $n = 1210$ ) of patients without post-stroke epilepsy discontinued BRV. At 12 months,  $\geq 50\%$  seizure reduction was achieved in 39.1% and 38.0% of patients with and without post-stroke epilepsy, respectively (mFAS) (Supplementary Fig. S3a); seizure freedom was achieved in 34.4% and 14.9% (FAS)

(Supplementary Fig. S3b); continuous seizure freedom was achieved in 28.1% and 12.0% (Supplementary Fig. S3c); and BRV retention was achieved in 68.8% and 71.7% (Supplementary Fig. S3d). TEAEs since prior visit at 12 months were reported in 17.6% and 8.2% of patients with and without post-stroke epilepsy, respectively (Supplementary Table S4).

Subgroup analyses by brain tumor–related epilepsy (BTRE) status showed that, during the whole study follow-up, 39.0% ( $n = 59$ ) of patients with BTRE and 33.3% ( $n = 1200$ ) without BTRE discontinued BRV. At 12 months,  $\geq 50\%$  seizure reduction was achieved in 35.1% and 38.2% of patients with and without BTRE, respectively (mFAS) (Supplementary Fig. S3a); seizure freedom was achieved in 17.5% and 15.5% (FAS) (Supplementary Fig. S3b); continuous seizure freedom was achieved in 10.0% and 12.8% (Supplementary Fig. S3c); and BRV retention was achieved in 67.2% and 71.8% (Supplementary Fig. S3d). TEAEs since prior visit at 12 months were reported in 11.6% and 8.4% of patients with and without BTRE, respectively (Supplementary Table S4).

Subgroup analyses by traumatic brain injury–related epilepsy (TBIE) status showed that, during the whole study follow-up, 22.0% ( $n = 41$ ) of patients with TBIE and 33.9% ( $n = 1218$ ) of patients without TBIE discontinued BRV. At 12 months,  $\geq 50\%$  seizure reduction was achieved in 50.0% and 37.7% of patients with and without TBIE, respectively (mFAS) (Supplementary Fig. S3a); seizure freedom was achieved in 20.0% and 15.5% (FAS) (Supplementary Fig. S3b); continuous seizure freedom was achieved in 16.0% and 12.5% (Supplementary Fig. S3c); and BRV retention was achieved in 82.9% and 71.2% (Supplementary Fig. S3d). TEAEs since prior visit at 12 months were reported in 3.4% and 8.7% of patients with and without TBIE, respectively (Supplementary Table S4).

**Supplementary Table S1** TEAEs since prior visit in patients with psychiatric comorbidity who switched from LEV to BRV and in patients who switched from other ASMs to BRV at index, and in patients without psychiatric comorbidity who switched from LEV to BRV and in patients who switched from other ASMs at index (FAS)

| Patients, <i>n</i> (%)                                              | 3 months                                   |                                                   |                                            |                                                   | 6 months                                   |                                                   |                                            |                                                   | 12 months                                  |                                                   |                                            |                                                   |
|---------------------------------------------------------------------|--------------------------------------------|---------------------------------------------------|--------------------------------------------|---------------------------------------------------|--------------------------------------------|---------------------------------------------------|--------------------------------------------|---------------------------------------------------|--------------------------------------------|---------------------------------------------------|--------------------------------------------|---------------------------------------------------|
|                                                                     | With psychiatric comorbidity               |                                                   | Without psychiatric comorbidity            |                                                   | With psychiatric comorbidity               |                                                   | Without psychiatric comorbidity            |                                                   | With psychiatric comorbidity               |                                                   | Without psychiatric comorbidity            |                                                   |
|                                                                     | Switched from LEV to BRV<br><i>n</i> = 225 | Switched from other ASMs to BRV<br><i>n</i> = 317 | Switched from LEV to BRV<br><i>n</i> = 441 | Switched from other ASMs to BRV<br><i>n</i> = 486 | Switched from LEV to BRV<br><i>n</i> = 189 | Switched from other ASMs to BRV<br><i>n</i> = 273 | Switched from LEV to BRV<br><i>n</i> = 404 | Switched from other ASMs to BRV<br><i>n</i> = 444 | Switched from LEV to BRV<br><i>n</i> = 153 | Switched from other ASMs to BRV<br><i>n</i> = 241 | Switched from LEV to BRV<br><i>n</i> = 368 | Switched from other ASMs to BRV<br><i>n</i> = 408 |
| Any TEAEs                                                           | 66 (29.3)                                  | 81 (25.6)                                         | 104 (23.6)                                 | 123 (25.3)                                        | 25 (13.2)                                  | 39 (14.3)                                         | 61 (15.1)                                  | 59 (13.3)                                         | 14 (9.2)                                   | 24 (10.0)                                         | 36 (9.8)                                   | 33 (8.1)                                          |
| Severity of TEAEs <sup>a,b</sup>                                    |                                            |                                                   |                                            |                                                   |                                            |                                                   |                                            |                                                   |                                            |                                                   |                                            |                                                   |
| Mild                                                                | 31 (53.4) <sup>c</sup>                     | 23 (39.7) <sup>e</sup>                            | 41 (55.4) <sup>d</sup>                     | 33 (44.0) <sup>e</sup>                            | 11 (50.0) <sup>f</sup>                     | 18 (62.1) <sup>g</sup>                            | 20 (54.1) <sup>h</sup>                     | 12 (38.7) <sup>i</sup>                            | 4 (30.8) <sup>j</sup>                      | 13 (72.2) <sup>k</sup>                            | 5 (23.8) <sup>l</sup>                      | 10 (47.6) <sup>l</sup>                            |
| Moderate                                                            | 21 (36.2) <sup>e</sup>                     | 25 (43.1) <sup>e</sup>                            | 22 (29.7) <sup>d</sup>                     | 33 (44.0) <sup>e</sup>                            | 8 (36.4) <sup>f</sup>                      | 10 (34.5) <sup>g</sup>                            | 14 (37.8) <sup>h</sup>                     | 17 (54.8) <sup>i</sup>                            | 7 (53.8) <sup>j</sup>                      | 5 (27.8) <sup>k</sup>                             | 16 (76.2) <sup>l</sup>                     | 8 (38.1) <sup>l</sup>                             |
| Severe                                                              | 6 (10.3) <sup>e</sup>                      | 9 (15.5) <sup>e</sup>                             | 11 (14.9) <sup>d</sup>                     | 9 (12.0) <sup>e</sup>                             | 3 (13.6) <sup>f</sup>                      | 1 (3.4) <sup>g</sup>                              | 3 (8.1) <sup>h</sup>                       | 2 (6.5) <sup>i</sup>                              | 2 (15.4) <sup>j</sup>                      | 0                                                 | 0                                          | 3 (14.3) <sup>l</sup>                             |
| Life-threatening                                                    | 0                                          | 1 (1.7) <sup>c,m</sup>                            | 0                                          | 0                                                 | 0                                          | 0                                                 | 0                                          | 0                                                 | 0                                          | 0                                                 | 0                                          | 0                                                 |
| Psychiatric TEAEs <sup>n</sup>                                      | 18 (8.0)                                   | 19 (6.0)                                          | 24 (5.4)                                   | 29 (6.0)                                          | 5 (2.6)                                    | 5 (1.8)                                           | 15 (3.7)                                   | 8 (1.8)                                           | 3 (2.0)                                    | 8 (3.3)                                           | 12 (3.3)                                   | 8 (2.0)                                           |
| Cognitive TEAEs                                                     | 4 (1.8)                                    | 11 (3.5)                                          | 9 (2.0)                                    | 15 (3.1)                                          | 1 (0.5)                                    | 4 (1.5)                                           | 5 (1.2)                                    | 8 (1.8)                                           | 0                                          | 4 (1.7)                                           | 4 (1.1)                                    | 3 (0.7)                                           |
| Behavioral TEAEs                                                    | 11 (4.9)                                   | 15 (4.7)                                          | 22 (5.0)                                   | 25 (5.1)                                          | 5 (2.6)                                    | 7 (2.3)                                           | 11 (2.7)                                   | 10 (2.3)                                          | 4 (2.6)                                    | 2 (0.8)                                           | 6 (1.6)                                    | 4 (1.0)                                           |
| TEAEs <sup>o,p</sup> reported by ≥ 3% of patients at any time point |                                            |                                                   |                                            |                                                   |                                            |                                                   |                                            |                                                   |                                            |                                                   |                                            |                                                   |
| Dizziness                                                           | 13 (5.8)                                   | 16 (5.0)                                          | 16 (3.6)                                   | 19 (3.9)                                          | 2 (1.1)                                    | 4 (1.5)                                           | 4 (1.0)                                    | 6 (1.4)                                           | 3 (2.0)                                    | 4 (1.7)                                           | 2 (0.5)                                    | 2 (0.5)                                           |
| Somnolence                                                          | 11 (4.9)                                   | 10 (3.2)                                          | 18 (4.1)                                   | 19 (3.9)                                          | 6 (3.2)                                    | 8 (2.9)                                           | 12 (3.0)                                   | 8 (1.8)                                           | 6 (3.9)                                    | 5 (2.1)                                           | 10 (2.7)                                   | 5 (1.2)                                           |
| Irritability                                                        | 9 (4.0)                                    | 13 (4.1)                                          | 17 (3.9)                                   | 18 (3.7)                                          | 5 (2.6)                                    | 5 (1.8)                                           | 7 (1.7)                                    | 9 (2.0)                                           | 4 (2.6)                                    | 0                                                 | 3 (0.8)                                    | 3 (0.7)                                           |
| Fatigue                                                             | 8 (3.6)                                    | 15 (4.7)                                          | 16 (3.6)                                   | 20 (4.1)                                          | 3 (1.6)                                    | 6 (2.2)                                           | 2 (0.5)                                    | 7 (1.6)                                           | 0                                          | 5 (2.1)                                           | 1 (0.3)                                    | 2 (0.5)                                           |
| Depression                                                          | 7 (3.1)                                    | 8 (2.5)                                           | 6 (1.4)                                    | 11 (2.3)                                          | 0                                          | 1 (0.4)                                           | 2 (0.5)                                    | 0                                                 | 0                                          | 1 (0.4)                                           | 2 (0.5)                                    | 1 (0.2)                                           |

*AE* adverse event, *ASM* antiseizure medication, *BRV* brivaracetam, *FAS* full analysis set, *LEV* levetiracetam, *TEAE* treatment-emergent adverse event

<sup>a</sup>Patients with reported severity; <sup>b</sup>Excluding patients who had an AE that was not further described; <sup>c</sup>*n* = 58; <sup>d</sup>*n* = 74; <sup>e</sup>*n* = 75; <sup>f</sup>*n* = 22; <sup>g</sup>*n* = 29; <sup>h</sup>*n* = 37; <sup>i</sup>*n* = 31; <sup>j</sup>*n* = 13; <sup>k</sup>*n* = 18; <sup>l</sup>*n* = 21; <sup>m</sup>One TEAE of suicide was documented as life-threatening; <sup>n</sup>Behavioral TEAEs that fulfilled the criteria for psychiatric TEAEs were included in the psychiatric TEAEs category; <sup>o</sup>Medical Dictionary for Regulatory Activities version 24.1; <sup>p</sup>Patients with recorded AE that was not further described at 3 months/6 months/12 months: patients with psychiatric comorbidity and switched from LEV to BRV, 11 (4.9%)/5 (2.6%)/1 (0.7%); patients with psychiatric comorbidity and switched from other ASMs to BRV, 6 (1.9%)/5 (1.8%)/0; patients without psychiatric comorbidity and switched from LEV to BRV, 4 (0.9%)/15 (3.7%)/6 (1.6%); patients without psychiatric comorbidity and switched from other ASMs to BRV, 8 (1.6%)/14 (3.2%)/8 (2.0%)

**Supplementary Table S2** Baseline demographics and epilepsy characteristics in patients with focal-onset seizures at baseline and a BRV dose of  $\leq 200$  mg/day used as add-on (FAS)

|                                                                       | CLD comorbidity              |                               | Psychiatric comorbidity                    |                                               | Post-stroke epilepsy status            |                                             | BTRE status                  |                               | TBIE status                   |                               |
|-----------------------------------------------------------------------|------------------------------|-------------------------------|--------------------------------------------|-----------------------------------------------|----------------------------------------|---------------------------------------------|------------------------------|-------------------------------|-------------------------------|-------------------------------|
|                                                                       | With CLD<br>N = 356          | Without CLD<br>N = 1078       | With psychiatric<br>comorbidity<br>N = 533 | Without psychiatric<br>comorbidity<br>N = 887 | With post-stroke<br>epilepsy<br>N = 49 | Without post-stroke<br>epilepsy<br>N = 1214 | With BTRE<br>N = 59          | Without BTRE<br>N = 1204      | With TBIE<br>N = 42           | Without TBIE<br>N = 1221      |
| Age at baseline, n (%), years                                         |                              |                               |                                            |                                               |                                        |                                             |                              |                               |                               |                               |
| 16–49                                                                 | 297 (83.4)                   | 722 (67.0)                    | 378 (70.9)                                 | 629 (15.4)                                    | 17 (34.7)                              | 880 (72.5)                                  | 43 (72.9)                    | 854 (70.9)                    | 24 (57.1)                     | 873 (71.5)                    |
| 50–64                                                                 | 44 (12.4)                    | 238 (22.1)                    | 112 (21.0)                                 | 168 (18.9)                                    | 12 (24.5)                              | 237 (19.5)                                  | 12 (20.3)                    | 237 (19.7)                    | 8 (19.0)                      | 241 (19.7)                    |
| 65–74                                                                 | 13 (3.7)                     | 78 (7.2)                      | 31 (5.8)                                   | 60 (6.8)                                      | 10 (20.4)                              | 70 (5.8)                                    | 2 (3.4)                      | 78 (6.5)                      | 9 (21.4)                      | 71 (5.8)                      |
| $\geq 75$                                                             | 2 (0.6)                      | 40 (3.7)                      | 12 (2.3)                                   | 30 (3.4)                                      | 10 (20.4)                              | 27 (2.2)                                    | 2 (3.4)                      | 35 (2.9)                      | 1 (2.4)                       | 36 (2.9)                      |
| Sex, n (%)                                                            |                              |                               |                                            |                                               |                                        |                                             |                              |                               |                               |                               |
| Male                                                                  | 189 (53.1)                   | 502 (46.6)                    | 246 (46.2)                                 | 438 (49.4)                                    | 26 (53.1)                              | 576 (47.4)                                  | 32 (54.2)                    | 570 (47.3)                    | 29 (69.0)                     | 573 (46.9)                    |
| Female                                                                | 167 (46.9)                   | 576 (53.4)                    | 287 (53.8)                                 | 449 (50.6)                                    | 23 (46.9)                              | 638 (52.6)                                  | 27 (45.8)                    | 634 (52.7)                    | 13 (31.0)                     | 648 (53.1)                    |
| Duration of epilepsy,<br>median (Q1, Q3), years                       | 16.0 (4.0, 28.0)             | 18.0 (9.0, 31.0) <sup>a</sup> | 18.0 (8.0, 31.0) <sup>b</sup>              | 17.0 (8.0, 30.0) <sup>c</sup>                 | 23.5 (3.0, 55.0) <sup>d</sup>          | 17.0 (7.0, 29.5) <sup>e</sup>               | 13.0 (4.0, 28.0)             | 17.0 (8.0, 30.0) <sup>f</sup> | 19.0 (9.0, 29.0) <sup>g</sup> | 17.0 (7.0, 30.0) <sup>h</sup> |
| Seizure types at baseline, <sup>i</sup> n (%)                         |                              |                               |                                            |                                               |                                        |                                             |                              |                               |                               |                               |
| Focal-onset                                                           | 347 (97.5)                   | 1075 (99.7)                   | 527 (98.9)                                 | 881 (99.3)                                    | 49 (100.0)                             | 1202 (99.0)                                 | 59 (100.0)                   | 1192 (99.0)                   | 41 (97.6)                     | 1210 (99.1)                   |
| Focal-onset with<br>secondary<br>generalization                       | 202 (78.0) <sup>j</sup>      | 429 (53.2) <sup>k</sup>       | 264 (67.5) <sup>l</sup>                    | 362 (54.0) <sup>m</sup>                       | 25 (69.4) <sup>n</sup>                 | 556 (65.2) <sup>o</sup>                     | 20 (55.6) <sup>p</sup>       | 561 (65.8) <sup>o</sup>       | 22 (73.3) <sup>p</sup>        | 559 (65.1) <sup>q</sup>       |
| Generalized-onset                                                     | 8 (2.2)                      | 2 (0.2)                       | 7 (1.3)                                    | 3 (0.3)                                       | 0                                      | 10 (0.8)                                    | 0                            | 10 (0.8)                      | 0                             | 10 (0.8)                      |
| Unknown-onset                                                         | 9 (2.5)                      | 3 (0.3)                       | 6 (1.1)                                    | 6 (0.7)                                       | 0                                      | 12 (1.0)                                    | 0                            | 12 (1.0)                      | 1 (2.4)                       | 11 (0.9)                      |
| Seizure frequency/28 days<br>at index, median (Q1, Q3)                | 7.7 (3.0, 30.0) <sup>r</sup> | 4.0 (1.0, 12.0) <sup>s</sup>  | 4.0 (1.0, 12.0) <sup>t</sup>               | 4.3 (1.7, 13.3) <sup>u</sup>                  | 1.0 (0.7, 6.0) <sup>v</sup>            | 4.0 (1.5, 13.0) <sup>w</sup>                | 6.0 (2.0, 12.0) <sup>x</sup> | 4.0 (1.3, 12.0) <sup>y</sup>  | 2.3 (1.0, 6.0)                | 4.0 (1.3, 12.6) <sup>z</sup>  |
| Most common etiology ( $\geq 5\%$ of patients), <sup>i,aa</sup> n (%) |                              |                               |                                            |                                               |                                        |                                             |                              |                               |                               |                               |

|                                                                                       |                               |                              |                              |                              |                             |                              |                              |                              |                              |                              |
|---------------------------------------------------------------------------------------|-------------------------------|------------------------------|------------------------------|------------------------------|-----------------------------|------------------------------|------------------------------|------------------------------|------------------------------|------------------------------|
| Malformation of cortical development                                                  | 71 (19.9)                     | 187 (17.3)                   | 105 (19.7)                   | 151 (17.0)                   | 0                           | 234 (19.3)                   | 1 (1.7)                      | 233 (19.4)                   | 1 (2.4)                      | 233 (19.1)                   |
| Genetic                                                                               | 8 (2.2)                       | 10 (0.9)                     | 8 (1.5)                      | 10 (1.1)                     | 0                           | 18 (1.5)                     | 1 (1.7)                      | 17 (1.4)                     | 0                            | 18 (1.5)                     |
| Tumor-related                                                                         | 11 (3.1)                      | 62 (5.8)                     | 19 (3.6)                     | 52 (5.9)                     | 1 (2.0)                     | 62 (5.1)                     | 55 (93.2)                    | 8 (0.7)                      | 0                            | 63 (5.2)                     |
| Vascular                                                                              | 11 (3.1)                      | 68 (6.3)                     | 27 (5.1)                     | 51 (5.7)                     | 42 (85.7)                   | 25 (2.1)                     | 0                            | 67 (5.6)                     | 0                            | 67 (5.5)                     |
| Traumatic                                                                             | 11 (3.1)                      | 37 (3.4)                     | 18 (3.4)                     | 29 (3.3)                     | 0                           | 44 (3.6)                     | 2 (3.4)                      | 42 (3.5)                     | 41 (97.6)                    | 3 (0.2)                      |
| Post infectious                                                                       | 9 (2.5)                       | 22 (2.0)                     | 5 (0.9)                      | 26 (2.9)                     | 3 (6.1)                     | 25 (2.1)                     | 0                            | 28 (2.3)                     | 0                            | 28 (2.3)                     |
| Most common comorbid conditions ( $\geq 10\%$ of patients), <sup>i</sup> <i>n</i> (%) |                               |                              |                              |                              |                             |                              |                              |                              |                              |                              |
| CLD                                                                                   | 356 (100.0)                   | 0                            | 152 (28.6) <sup>ab</sup>     | 194 (22.0) <sup>ac</sup>     | 12 (24.5)                   | 309 (25.6) <sup>ad</sup>     | 8 (13.6)                     | 313 (26.1) <sup>ac</sup>     | 11 (26.2)                    | 310 (25.5) <sup>af</sup>     |
| Neurological                                                                          | 78 (41.5) <sup>ag</sup>       | 166 (23.3) <sup>ah</sup>     | 97 (31.2) <sup>ai</sup>      | 149 (25.3) <sup>aj</sup>     | 19 (67.9) <sup>ak</sup>     | 210 (30.2) <sup>al</sup>     | 5 (19.2) <sup>am</sup>       | 224 (32.1) <sup>an</sup>     | 15 (62.5) <sup>ao</sup>      | 214 (30.6) <sup>ap</sup>     |
| Psychiatric                                                                           | 152 (43.9) <sup>aq</sup>      | 379 (35.5) <sup>ar</sup>     | 533 (100.0)                  | 0                            | 18 (36.7)                   | 457 (38.3) <sup>as</sup>     | 17 (29.8) <sup>at</sup>      | 458 (38.6) <sup>au</sup>     | 16 (39.0) <sup>av</sup>      | 459 (38.2) <sup>aw</sup>     |
| Cardiovascular disease                                                                | 20 (7.0) <sup>ax</sup>        | 105 (11.9) <sup>ay</sup>     | 58 (13.2) <sup>az</sup>      | 67 (9.2) <sup>ba</sup>       | 25 (51.0)                   | 100 (8.9) <sup>bb</sup>      | 3 (5.4) <sup>bc</sup>        | 122 (10.9) <sup>bd</sup>     | 7 (17.9) <sup>bc</sup>       | 118 (10.4) <sup>bf</sup>     |
| Diabetes/endocrine                                                                    | 14 (4.9) <sup>ax</sup>        | 38 (4.3) <sup>bg</sup>       | 24 (5.5) <sup>az</sup>       | 27 (3.7) <sup>bh</sup>       | 6 (12.2)                    | 46 (4.1) <sup>bi</sup>       | 2 (3.6) <sup>bc</sup>        | 50 (4.5) <sup>bj</sup>       | 1 (2.6) <sup>bc</sup>        | 51 (4.5) <sup>bk</sup>       |
| Cancer                                                                                | 2 (1.3) <sup>bl</sup>         | 18 (3.2) <sup>bm</sup>       | 5 (2.0) <sup>bn</sup>        | 15 (3.2) <sup>bo</sup>       | 1 (3.6) <sup>ak</sup>       | 19 (2.7) <sup>al</sup>       | 8 (30.8) <sup>am</sup>       | 12 (1.7) <sup>an</sup>       | 1 (4.2) <sup>ao</sup>        | 19 (2.7) <sup>ap</sup>       |
| Prior (lifetime) LEV                                                                  | 167 (62.1) <sup>bp</sup>      | 474 (61.6) <sup>bq</sup>     | 256 (62.0) <sup>br</sup>     | 378 (61.7) <sup>bs</sup>     | 21 (60.0) <sup>bt</sup>     | 476 (57.1) <sup>bu</sup>     | 23 (54.8) <sup>g</sup>       | 474 (57.4) <sup>bv</sup>     | 19 (61.3) <sup>bw</sup>      | 478 (57.1) <sup>bx</sup>     |
| Switched from LEV or other ASMs to BRV, <i>n</i> (%)                                  |                               |                              |                              |                              |                             |                              |                              |                              |                              |                              |
| Switch from LEV                                                                       | 144 (41.3) <sup>by</sup>      | 475 (44.6) <sup>bz</sup>     | 220 (41.7) <sup>ca</sup>     | 396 (45.3) <sup>cb</sup>     | 25 (53.2) <sup>v</sup>      | 447 (37.4) <sup>cc</sup>     | 29 (50.0) <sup>cd</sup>      | 443 (37.4) <sup>cc</sup>     | 12 (29.3) <sup>av</sup>      | 460 (38.3) <sup>aw</sup>     |
| Switch from other ASMs                                                                | 203 (58.2) <sup>by</sup>      | 570 (53.6) <sup>bz</sup>     | 299 (56.7) <sup>ca</sup>     | 465 (53.2) <sup>cb</sup>     | 20 (42.6) <sup>v</sup>      | 730 (61.0) <sup>cc</sup>     | 27 (46.6) <sup>cd</sup>      | 723 (61.0) <sup>cc</sup>     | 27 (65.9) <sup>av</sup>      | 723 (60.1) <sup>aw</sup>     |
| No switch                                                                             | 2 (0.6) <sup>by</sup>         | 19 (1.8) <sup>bz</sup>       | 8 (1.5) <sup>ca</sup>        | 13 (1.5) <sup>cb</sup>       | 2 (4.3) <sup>v</sup>        | 19 (1.6) <sup>cc</sup>       | 2 (3.4) <sup>cd</sup>        | 19 (1.6) <sup>cc</sup>       | 2 (4.9) <sup>av</sup>        | 19 (1.6) <sup>aw</sup>       |
| Monotherapy/polytherapy at index, <i>n</i> (%)                                        |                               |                              |                              |                              |                             |                              |                              |                              |                              |                              |
| Monotherapy <sup>cf</sup>                                                             | 0                             | 0                            | 0                            | 0                            | 0                           | 0                            | 0                            | 0                            | 0                            | 0                            |
| Polytherapy <sup>cg</sup>                                                             | 356 (100.0)                   | 1078 (100.0)                 | 533 (100.0)                  | 887 (100.0)                  | 49 (100.0)                  | 1214 (100.0)                 | 59 (100.0)                   | 1204 (100.0)                 | 42 (100.0)                   | 1221 (100.0)                 |
| Number of prior ASMs at index, <sup>ch</sup> median (Q1, Q3)                          | 7.0 (4.0, 10.0) <sup>by</sup> | 4.0 (2.0, 7.0) <sup>bz</sup> | 5.0 (3.0, 8.0) <sup>ca</sup> | 5.0 (2.0, 8.0) <sup>cb</sup> | 2.0 (1.0, 5.0) <sup>v</sup> | 5.0 (2.0, 8.0) <sup>cc</sup> | 3.0 (1.0, 6.0) <sup>cd</sup> | 5.0 (2.0, 8.0) <sup>cc</sup> | 4.0 (2.0, 7.0) <sup>av</sup> | 5.0 (2.0, 8.0) <sup>aw</sup> |
| 0–1, <i>n</i> (%)                                                                     | 34 (9.7) <sup>by</sup>        | 174 (16.4) <sup>bz</sup>     | 69 (13.1) <sup>ca</sup>      | 136 (15.6) <sup>cb</sup>     | 20 (42.6) <sup>v</sup>      | 184 (15.4) <sup>cc</sup>     | 17 (29.3) <sup>cd</sup>      | 187 (15.8) <sup>cc</sup>     | 5 (12.2) <sup>av</sup>       | 199 (16.6) <sup>aw</sup>     |
| 2–3, <i>n</i> (%)                                                                     | 39 (11.2) <sup>by</sup>       | 259 (24.3) <sup>bz</sup>     | 93 (17.6) <sup>ca</sup>      | 204 (23.3) <sup>cb</sup>     | 13 (27.7) <sup>v</sup>      | 257 (21.5) <sup>cc</sup>     | 17 (29.3) <sup>cd</sup>      | 253 (21.4) <sup>cc</sup>     | 13 (31.7) <sup>av</sup>      | 257 (21.4) <sup>aw</sup>     |

|                                                                  |                          |                          |                          |                          |                       |                          |                         |                          |                         |                          |
|------------------------------------------------------------------|--------------------------|--------------------------|--------------------------|--------------------------|-----------------------|--------------------------|-------------------------|--------------------------|-------------------------|--------------------------|
| 4–6, <i>n</i> (%)                                                | 96 (27.5) <sup>by</sup>  | 316 (29.7) <sup>bz</sup> | 162 (30.7) <sup>ca</sup> | 247 (28.3) <sup>cb</sup> | 6 (12.8) <sup>v</sup> | 343 (28.7) <sup>cc</sup> | 14 (24.1) <sup>cd</sup> | 335 (28.3) <sup>cc</sup> | 10 (24.4) <sup>av</sup> | 339 (28.2) <sup>aw</sup> |
| ≥ 7, <i>n</i> (%)                                                | 180 (51.6) <sup>by</sup> | 315 (29.6) <sup>bz</sup> | 203 (38.5) <sup>ca</sup> | 287 (32.8) <sup>cb</sup> | 8 (17.0) <sup>v</sup> | 412 (34.4) <sup>cc</sup> | 10 (17.2) <sup>cd</sup> | 410 (34.6) <sup>cc</sup> | 13 (31.7) <sup>av</sup> | 407 (33.9) <sup>aw</sup> |
| Number of concomitant maintenance ASMs at index, median (Q1, Q3) | 3.0, (1.0, 4.0)          | 2.0 (1.0, 3.0)           | 2.0 (1.0, 3.0)           | 2.0 (1.0, 3.0)           | 1.0 (1.0, 2.0)        | 2.0 (1.0, 3.0)           | 2.0 (1.0, 3.0)          | 2.0 (1.0, 3.0)           | 2.0 (1.0, 3.0)          | 2.0 (1.0, 3.0)           |

*ASM* antiseizure medication, *BRV* brivaracetam, *BTRE* brain tumor–related epilepsy, *CLD* cognitive/learning disability, *FAS* full analysis set, *LEV* levetiracetam, *Q1* 25th quartile, *Q3* 75th quartile, *TBIE* traumatic brain injury–related epilepsy

<sup>a</sup>*n* = 1055; <sup>b</sup>*n* = 523; <sup>c</sup>*n* = 867; <sup>d</sup>*n* = 48; <sup>e</sup>*n* = 1184; <sup>f</sup>*n* = 1173; <sup>g</sup>*n* = 42; <sup>h</sup>*n* = 1190; <sup>i</sup>Patients could have had more than one response; <sup>j</sup>*n* = 259; <sup>k</sup>*n* = 806; <sup>l</sup>*n* = 391; <sup>m</sup>*n* = 670; <sup>n</sup>*n* = 36; <sup>o</sup>*n* = 853; <sup>p</sup>*n* = 30; <sup>q</sup>*n* = 859; <sup>r</sup>*n* = 308; <sup>s</sup>*n* = 902; <sup>t</sup>*n* = 456; <sup>u</sup>*n* = 740; <sup>v</sup>*n* = 47; <sup>w</sup>*n* = 1169; <sup>x</sup>*n* = 59; <sup>y</sup>*n* = 1157; <sup>z</sup>*n* = 1174; <sup>aa</sup>Patients with unknown or other etiology: patients with CLD, 239 (67.1%); patients without CLD, 693 (64.3%); patients with psychiatric comorbidity, 353 (66.2%); patients without psychiatric comorbidity, 571 (64.4%); patients with post-stroke epilepsy, 3 (6.1%); patients without post-stroke epilepsy, 811 (66.8%); patients without BTRE, 814 (67.6%); patients without TBIE, 814 (66.7%); <sup>ab</sup>*n* = 531; <sup>ac</sup>*n* = 882; <sup>ad</sup>*n* = 1207; <sup>ae</sup>*n* = 1197; <sup>af</sup>*n* = 1214; <sup>ag</sup>*n* = 188; <sup>ah</sup>*n* = 712; <sup>ai</sup>*n* = 311; <sup>aj</sup>*n* = 590; <sup>ak</sup>*n* = 28; <sup>al</sup>*n* = 696; <sup>am</sup>*n* = 26; <sup>an</sup>*n* = 698; <sup>ao</sup>*n* = 24; <sup>ap</sup>*n* = 700; <sup>aq</sup>*n* = 346; <sup>ar</sup>*n* = 1067; <sup>as</sup>*n* = 1194; <sup>at</sup>*n* = 57; <sup>au</sup>*n* = 1186; <sup>av</sup>*n* = 41; <sup>aw</sup>*n* = 1202; <sup>ax</sup>*n* = 287; <sup>ay</sup>*n* = 879; <sup>az</sup>*n* = 439; <sup>ba</sup>*n* = 725; <sup>bb</sup>*n* = 1124; <sup>bc</sup>*n* = 56; <sup>bd</sup>*n* = 1117; <sup>be</sup>*n* = 39; <sup>bf</sup>*n* = 1134; <sup>bg</sup>*n* = 881; <sup>bh</sup>*n* = 727; <sup>bi</sup>*n* = 1126; <sup>bj</sup>*n* = 1119; <sup>bk</sup>*n* = 1136; <sup>bl</sup>*n* = 153; <sup>bm</sup>*n* = 569; <sup>bn</sup>*n* = 253; <sup>bo</sup>*n* = 471; <sup>bp</sup>*n* = 269; <sup>bq</sup>*n* = 769; <sup>br</sup>*n* = 413; <sup>bs</sup>*n* = 613; <sup>bt</sup>*n* = 35; <sup>bu</sup>*n* = 833; <sup>bv</sup>*n* = 826; <sup>bw</sup>*n* = 31; <sup>bx</sup>*n* = 837; <sup>by</sup>*n* = 349; <sup>bz</sup>*n* = 1064; <sup>ca</sup>*n* = 527; <sup>cb</sup>*n* = 874; <sup>cc</sup>*n* = 1196; <sup>cd</sup>*n* = 58; <sup>ce</sup>*n* = 1185; <sup>cf</sup>No concomitant ASM at index; <sup>cg</sup>Concomitant ASM(s) at index; <sup>ch</sup>Any ASM used and stopped before BRV initiation



**Supplementary Table S3** TEAEs since prior visit, by comorbidity, in patients with focal-onset seizures and a BRV dose of  $\leq 200$  mg/day used as add-on at index

| Patients, <i>n</i> (%)                                                     | 3 months                   |                                |                                                   |                                                      | 6 months                   |                               |                                                   |                                                      | 12 months                  |                               |                                                   |                                                      |
|----------------------------------------------------------------------------|----------------------------|--------------------------------|---------------------------------------------------|------------------------------------------------------|----------------------------|-------------------------------|---------------------------------------------------|------------------------------------------------------|----------------------------|-------------------------------|---------------------------------------------------|------------------------------------------------------|
|                                                                            | CLD comorbidity            |                                | Psychiatric comorbidity                           |                                                      | CLD comorbidity            |                               | Psychiatric comorbidity                           |                                                      | CLD comorbidity            |                               | Psychiatric comorbidity                           |                                                      |
|                                                                            | With CLD<br><i>n</i> = 329 | Without CLD<br><i>n</i> = 1026 | With psychiatric<br>comorbidity<br><i>n</i> = 497 | Without psychiatric<br>comorbidity<br><i>n</i> = 844 | With CLD<br><i>n</i> = 283 | Without CLD<br><i>n</i> = 913 | With psychiatric<br>comorbidity<br><i>n</i> = 421 | Without psychiatric<br>comorbidity<br><i>n</i> = 765 | With CLD<br><i>n</i> = 244 | Without CLD<br><i>n</i> = 822 | With psychiatric<br>comorbidity<br><i>n</i> = 361 | Without psychiatric<br>comorbidity<br><i>n</i> = 698 |
| Any TEAEs                                                                  | 76 (23.1)                  | 280 (27.3)                     | 134 (27.0)                                        | 217 (25.7)                                           | 46 (16.3)                  | 136 (14.9)                    | 63 (15.0)                                         | 115 (15.0)                                           | 29 (11.9)                  | 75 (9.1)                      | 37 (10.2)                                         | 66 (9.5)                                             |
| Severity of TEAEs <sup>a,b</sup>                                           |                            |                                |                                                   |                                                      |                            |                               |                                                   |                                                      |                            |                               |                                                   |                                                      |
| Mild                                                                       | 29 (52.7) <sup>c</sup>     | 100 (48.8) <sup>d</sup>        | 53 (48.2) <sup>e</sup>                            | 72 (50.0) <sup>f</sup>                               | 12 (38.7) <sup>g</sup>     | 55 (60.4) <sup>h</sup>        | 31 (59.6) <sup>i</sup>                            | 32 (48.5) <sup>j</sup>                               | 8 (36.4) <sup>k</sup>      | 25 (49.0) <sup>l</sup>        | 17 (56.7) <sup>m</sup>                            | 15 (35.7) <sup>n</sup>                               |
| Moderate                                                                   | 18 (32.7) <sup>c</sup>     | 78 (38.0) <sup>d</sup>         | 41 (37.3) <sup>e</sup>                            | 54 (37.5) <sup>f</sup>                               | 16 (51.6) <sup>g</sup>     | 33 (36.3) <sup>h</sup>        | 18 (34.6) <sup>i</sup>                            | 31 (47.0) <sup>j</sup>                               | 11 (50.0) <sup>k</sup>     | 24 (47.1) <sup>l</sup>        | 11 (36.7) <sup>m</sup>                            | 24 (57.1) <sup>n</sup>                               |
| Severe                                                                     | 8 (14.5) <sup>c</sup>      | 26 (12.7) <sup>d</sup>         | 15 (13.6) <sup>e</sup>                            | 18 (12.5) <sup>f</sup>                               | 3 (9.7) <sup>g</sup>       | 3 (3.3) <sup>h</sup>          | 3 (5.8) <sup>i</sup>                              | 3 (4.5) <sup>j</sup>                                 | 3 (13.6) <sup>k</sup>      | 2 (3.9) <sup>l</sup>          | 2 (6.7) <sup>m</sup>                              | 3 (7.1) <sup>n</sup>                                 |
| Life-threatening                                                           | 0                          | 1 (0.5) <sup>d,o</sup>         | 1 (0.9) <sup>e,o</sup>                            | 0                                                    | 0                          | 0                             | 0                                                 | 0                                                    | 0                          | 0                             | 0                                                 | 0                                                    |
| Psychiatric TEAEs <sup>p</sup>                                             | 18 (5.5)                   | 70 (6.8)                       | 36 (7.2)                                          | 48 (5.7)                                             | 11 (3.9)                   | 23 (2.5)                      | 10 (2.4)                                          | 22 (2.9)                                             | 9 (3.7)                    | 20 (2.4)                      | 10 (2.8)                                          | 19 (2.7)                                             |
| Cognitive TEAEs                                                            | 7 (2.1)                    | 29 (2.8)                       | 12 (2.4)                                          | 22 (2.6)                                             | 5 (1.8)                    | 8 (0.9)                       | 3 (0.7)                                           | 11 (1.4)                                             | 3 (1.2)                    | 6 (0.7)                       | 5 (1.4)                                           | 5 (0.7)                                              |
| Behavioral TEAEs                                                           | 25 (7.6)                   | 51 (5.0)                       | 25 (5.0)                                          | 48 (5.7)                                             | 16 (5.6)                   | 20 (2.2)                      | 14 (3.3)                                          | 19 (2.5)                                             | 8 (3.3)                    | 8 (1.0)                       | 6 (1.7)                                           | 9 (1.3)                                              |
| TEAE <sup>q,r</sup> , reported by $\geq 3\%$ of patients at any time point |                            |                                |                                                   |                                                      |                            |                               |                                                   |                                                      |                            |                               |                                                   |                                                      |
| Irritability                                                               | 19 (5.8)                   | 41 (4.0)                       | 22 (4.4)                                          | 37 (4.4)                                             | 11 (3.9)                   | 17 (1.9)                      | 12 (2.9)                                          | 15 (2.0)                                             | 4 (1.6)                    | 7 (0.9)                       | 5 (1.4)                                           | 6 (0.9)                                              |
| Somnolence                                                                 | 13 (4.0)                   | 46 (4.5)                       | 21 (4.2)                                          | 38 (4.5)                                             | 9 (3.2)                    | 26 (2.8)                      | 14 (3.3)                                          | 20 (2.6)                                             | 6 (2.5)                    | 20 (2.4)                      | 10 (2.8)                                          | 15 (2.1)                                             |
| Fatigue                                                                    | 6 (1.8)                    | 51 (5.0)                       | 24 (4.8)                                          | 32 (3.8)                                             | 1 (0.4)                    | 19 (2.1)                      | 9 (2.1)                                           | 9 (1.2)                                              | 2 (0.8)                    | 8 (1.0)                       | 6 (1.7)                                           | 3 (0.4)                                              |
| Dizziness                                                                  | 8 (2.4)                    | 53 (5.2)                       | 28 (5.6)                                          | 34 (4.0)                                             | 1 (0.4)                    | 15 (1.6)                      | 6 (1.4)                                           | 10 (1.3)                                             | 0                          | 9 (1.1)                       | 5 (1.4)                                           | 4 (0.6)                                              |

*AE* adverse event, *BRV* brivaracetam, *CLD* cognitive/learning disability, *TEAE* treatment-emergent adverse event

<sup>a</sup>Patients with reported severity; <sup>b</sup>Excluding patients who had an AE that was not further described; <sup>c</sup>*n* = 55; <sup>d</sup>*n* = 205; <sup>e</sup>*n* = 110; <sup>f</sup>*n* = 144; <sup>g</sup>*n* = 31; <sup>h</sup>*n* = 91; <sup>i</sup>*n* = 52; <sup>j</sup>*n* = 66; <sup>k</sup>*n* = 22; <sup>l</sup>*n* = 51; <sup>m</sup>*n* = 30; <sup>n</sup>*n* = 42; <sup>o</sup>One TEAE of suicide was documented as life threatening; <sup>p</sup>Behavioral TEAEs that fulfilled the criteria for psychiatric TEAEs were included in the psychiatric TEAEs category; <sup>q</sup>Medical Dictionary for Regulatory Activities version 24.1; <sup>r</sup>Patients with recorded AE that was not further described at 3 months/6 months/12 months: patients with CLD, 6 (1.8%)/12 (4.2%)/6 (2.5%); patients without CLD, 18 (1.8%)/24 (2.6%)/10 (1.2%); patients with psychiatric comorbidity, 12 (2.4%)/8 (1.9%)/1 (0.3%); patients without psychiatric comorbidity, 12 (1.4%)/28 (3.7%)/15 (2.1%)

**Supplementary Table S4** TEAEs since prior visit, by etiology, in patients with focal-onset seizures and a BRV dose of  $\leq 200$  mg/day used as add-on at index

| Patients, <i>n</i> (%)                                                    | 3 months                                   |                                                 |                            |                                 |                            |                                 | 6 months                                   |                                                 |                            |                                 |                            |                                 | 12 months                                  |                                                |                            |                                |                            |                                |
|---------------------------------------------------------------------------|--------------------------------------------|-------------------------------------------------|----------------------------|---------------------------------|----------------------------|---------------------------------|--------------------------------------------|-------------------------------------------------|----------------------------|---------------------------------|----------------------------|---------------------------------|--------------------------------------------|------------------------------------------------|----------------------------|--------------------------------|----------------------------|--------------------------------|
|                                                                           | Post-stroke epilepsy status                |                                                 | BTRE status                |                                 | TBIE status                |                                 | Post-stroke epilepsy status                |                                                 | BTRE status                |                                 | TBIE status                |                                 | Post-stroke epilepsy status                |                                                | BTRE status                |                                | TBIE status                |                                |
|                                                                           | With post-stroke epilepsy<br><i>n</i> = 42 | Without post-stroke epilepsy<br><i>n</i> = 1142 | With BTRE<br><i>n</i> = 57 | Without BTRE<br><i>n</i> = 1127 | With TBIE<br><i>n</i> = 38 | Without TBIE<br><i>n</i> = 1146 | With post-stroke epilepsy<br><i>n</i> = 37 | Without post-stroke epilepsy<br><i>n</i> = 1020 | With BTRE<br><i>n</i> = 47 | Without BTRE<br><i>n</i> = 1010 | With TBIE<br><i>n</i> = 33 | Without TBIE<br><i>n</i> = 1024 | With post-stroke epilepsy<br><i>n</i> = 34 | Without post-stroke epilepsy<br><i>n</i> = 913 | With BTRE<br><i>n</i> = 43 | Without BTRE<br><i>n</i> = 904 | With TBIE<br><i>n</i> = 29 | Without TBIE<br><i>n</i> = 918 |
| Any TEAEs                                                                 | 15 (35.7)                                  | 281 (24.6)                                      | 16 (28.1)                  | 280 (24.8)                      | 7 (18.4)                   | 289 (25.2)                      | 10 (27.0)                                  | 145 (14.2)                                      | 7 (14.9)                   | 148 (14.7)                      | 2 (6.1)                    | 153 (14.9)                      | 6 (17.6)                                   | 75 (8.2)                                       | 5 (11.6)                   | 76 (8.4)                       | 1 (3.4)                    | 80 (8.7)                       |
| Severity of TEAEs <sup>a,b</sup>                                          |                                            |                                                 |                            |                                 |                            |                                 |                                            |                                                 |                            |                                 |                            |                                 |                                            |                                                |                            |                                |                            |                                |
| Mild                                                                      | 7 (77.8) <sup>c</sup>                      | 103 (53.9) <sup>d</sup>                         | 7 (63.6) <sup>e</sup>      | 103 (54.5) <sup>f</sup>         | 3 (60.0) <sup>g</sup>      | 107 (54.9) <sup>h</sup>         | 5 (71.4) <sup>i</sup>                      | 53 (58.9) <sup>j</sup>                          | 3 (100.0) <sup>k</sup>     | 55 (58.5) <sup>l</sup>          | 2 (100.0) <sup>m</sup>     | 56 (58.9) <sup>n</sup>          | 4 (100.0) <sup>o</sup>                     | 22 (43.1) <sup>p</sup>                         | 1 (100.0) <sup>q</sup>     | 25 (46.3) <sup>r</sup>         | 1 (100.0) <sup>s</sup>     | 25 (46.3) <sup>t</sup>         |
| Moderate                                                                  | 2 (22.2) <sup>c</sup>                      | 69 (36.1) <sup>d</sup>                          | 4 (36.4) <sup>e</sup>      | 67 (35.4) <sup>f</sup>          | 2 (40.0) <sup>g</sup>      | 69 (35.4) <sup>h</sup>          | 2 (28.6) <sup>i</sup>                      | 35 (38.9) <sup>j</sup>                          | 0                          | 37 (39.4) <sup>l</sup>          | 0                          | 37 (38.9) <sup>n</sup>          | 0                                          | 26 (51.0) <sup>p</sup>                         | 0                          | 26 (48.1) <sup>r</sup>         | 0                          | 26 (48.1) <sup>t</sup>         |
| Severe                                                                    | 0                                          | 18 (9.4) <sup>d</sup>                           | 0                          | 18 (9.5) <sup>f</sup>           | 0                          | 18 (9.2) <sup>h</sup>           | 0                                          | 2 (2.2) <sup>j</sup>                            | 0                          | 2 (2.1) <sup>l</sup>            | 0                          | 2 (2.1) <sup>n</sup>            | 0                                          | 3 (5.9) <sup>p</sup>                           | 0                          | 3 (5.6) <sup>r</sup>           | 0                          | 3 (5.6) <sup>t</sup>           |
| Life-threatening                                                          | 0                                          | 1 (0.1) <sup>d,t</sup>                          | 0                          | 1 (0.5) <sup>f,t</sup>          | 0                          | 1 (0.5) <sup>h,t</sup>          | 0                                          | 0                                               | 0                          | 0                               | 0                          | 0                               | 0                                          | 0                                              | 0                          | 0                              | 0                          | 0                              |
| Psychiatric TEAEs <sup>u</sup>                                            | 6 (14.3)                                   | 67 (5.9)                                        | 5 (8.8)                    | 68 (6.0)                        | 0                          | 73 (6.4)                        | 1 (2.7)                                    | 26 (2.5)                                        | 3 (6.4)                    | 24 (2.4)                        | 0                          | 27 (2.6)                        | 1 (2.9)                                    | 23 (2.5)                                       | 1 (2.3)                    | 23 (2.5)                       | 0                          | 24 (2.6)                       |
| Cognitive TEAEs                                                           | 1 (2.4)                                    | 35 (3.1)                                        | 2 (3.5)                    | 34 (3.0)                        | 1 (2.6)                    | 35 (3.1)                        | 0                                          | 14 (1.4)                                        | 1 (2.1)                    | 13 (1.3)                        | 0                          | 14 (1.4)                        | 0                                          | 10 (1.1)                                       | 1 (2.3)                    | 9 (1.0)                        | 0                          | 10 (1.1)                       |
| Behavioral TEAEs                                                          | 4 (9.5)                                    | 56 (4.9)                                        | 3 (5.3)                    | 57 (5.1)                        | 2 (5.3)                    | 58 (5.1)                        | 1 (2.7)                                    | 27 (2.6)                                        | 1 (2.1)                    | 27 (2.7)                        | 0                          | 28 (2.7)                        | 0                                          | 10 (1.1)                                       | 0                          | 10 (1.1)                       | 0                          | 10 (1.1)                       |
| TEAEs <sup>v,w</sup> reported by $\geq 3\%$ of patients at any time point |                                            |                                                 |                            |                                 |                            |                                 |                                            |                                                 |                            |                                 |                            |                                 |                                            |                                                |                            |                                |                            |                                |
| Depression                                                                | 3 (7.1)                                    | 27 (2.4)                                        | 3 (5.3)                    | 27 (2.4)                        | 0                          | 30 (2.6)                        | 0                                          | 3 (0.3)                                         | 0                          | 3 (0.3)                         | 0                          | 3 (0.3)                         | 1 (2.9)                                    | 3 (0.3)                                        | 0                          | 4 (0.4)                        | 0                          | 4 (0.4)                        |
| Aggression                                                                | 2 (4.8)                                    | 16 (1.4)                                        | 2 (3.5)                    | 16 (1.4)                        | 0                          | 18 (1.6)                        | 0                                          | 10 (1.0)                                        | 1 (2.1)                    | 9 (0.9)                         | 0                          | 10 (1.0)                        | 0                                          | 5 (0.5)                                        | 0                          | 5 (0.6)                        | 0                          | 5 (0.5)                        |
| Fatigue                                                                   | 2 (4.8)                                    | 51 (4.5)                                        | 5 (8.8)                    | 48 (4.3)                        | 1 (2.6)                    | 52 (4.5)                        | 1 (2.7)                                    | 15 (1.5)                                        | 1 (2.1)                    | 15 (1.5)                        | 0                          | 16 (1.6)                        | 1 (2.9)                                    | 8 (0.9)                                        | 1 (2.3)                    | 8 (0.9)                        | 0                          | 9 (1.0)                        |
| Somnolence                                                                | 2 (4.8)                                    | 38 (3.3)                                        | 1 (1.8)                    | 39 (3.5)                        | 0                          | 40 (3.5)                        | 3 (8.1)                                    | 23 (2.3)                                        | 0                          | 26 (2.6)                        | 0                          | 26 (2.5)                        | 1 (2.9)                                    | 15 (1.6)                                       | 0                          | 16 (1.8)                       | 0                          | 16 (1.7)                       |
| Irritability                                                              | 1 (2.4)                                    | 43 (3.8)                                        | 2 (3.5)                    | 42 (3.7)                        | 2 (5.3)                    | 42 (3.7)                        | 0                                          | 19 (1.9)                                        | 0                          | 20 (2.0)                        | 0                          | 20 (2.0)                        | 0                                          | 5 (0.5)                                        | 0                          | 5 (0.6)                        | 0                          | 5 (0.5)                        |
| Dizziness                                                                 | 0                                          | 47 (4.1)                                        | 2 (3.5)                    | 45 (4.0)                        | 1 (2.6)                    | 46 (4.0)                        | 0                                          | 12 (1.2)                                        | 1 (2.1)                    | 11 (1.1)                        | 0                          | 12 (1.2)                        | 0                                          | 4 (0.4)                                        | 0                          | 4 (0.4)                        | 0                          | 4 (0.4)                        |

*AE* adverse event, *BRV* brivaracetam, *BTRE* brain tumor–related epilepsy, *TBIE* traumatic brain injury–related epilepsy, *TEAE* treatment-emergent adverse event

<sup>a</sup>Patients with reported severity; <sup>b</sup>Excluding patients who had an AE that was not further described; <sup>c</sup>*n* = 9; <sup>d</sup>*n* = 191; <sup>e</sup>*n* = 11; <sup>f</sup>*n* = 189; <sup>g</sup>*n* = 5; <sup>h</sup>*n* = 195; <sup>i</sup>*n* = 7; <sup>j</sup>*n* = 90; <sup>k</sup>*n* = 3; <sup>l</sup>*n* = 94; <sup>m</sup>*n* = 2; <sup>n</sup>*n* = 95; <sup>o</sup>*n* = 4; <sup>p</sup>*n* = 51; <sup>q</sup>*n* = 1; <sup>r</sup>*n* = 54; <sup>s</sup>*n* = 1; <sup>t</sup>One TEAE of suicide was documented as life threatening; <sup>u</sup>Behavioral TEAEs that fulfilled the criteria for psychiatric TEAEs were included in the psychiatric TEAEs category; <sup>v</sup>Medical Dictionary for Regulatory Activities version 24.1; <sup>w</sup>Patients with recorded AE that was not further described at 3 months/6 months/12 months: patients with post-stroke epilepsy, 3 (7.1%)/2 (5.4%)/1 (2.9%); patients without post-stroke epilepsy, 21 (1.8%)/34 (3.3%)/15 (1.6%); patients with BTRE, 1 (1.8%)/1 (2.1%)/2 (4.7%); patients without BTRE, 23 (2.0%)/35 (3.5%)/14 (1.5%); patients with TBIE, 2 (5.3%)/1 (3.0%)/1 (3.4%); patients without TBIE, 22 (1.9%)/35 (3.4%)/15 (1.6%)

**Supplementary Fig. S1** Analyses of effectiveness for patients with psychiatric comorbidity who switched from LEV to BRV and who switched from other ASMs to BRV at index, and in patients without psychiatric comorbidity who switched from LEV to BRV and who switched from other ASMs to BRV at index: (a)  $\geq 50\%$  seizure reduction (mFAS), (b) seizure freedom (FAS), (c) continuous seizure freedom (FAS), and (d) BRV retention (FAS). *n* represents the number of patients with data for the reported variable at each visit. Patients with missing data were excluded from all seizure analyses. Patients with missing data after BRV discontinuation were considered non responders and not seizure free. *ASM* antiseizure medication, *BRV* brivaracetam, *FAS* full analysis set, *LEV* levetiracetam, *mFAS* modified full analysis set

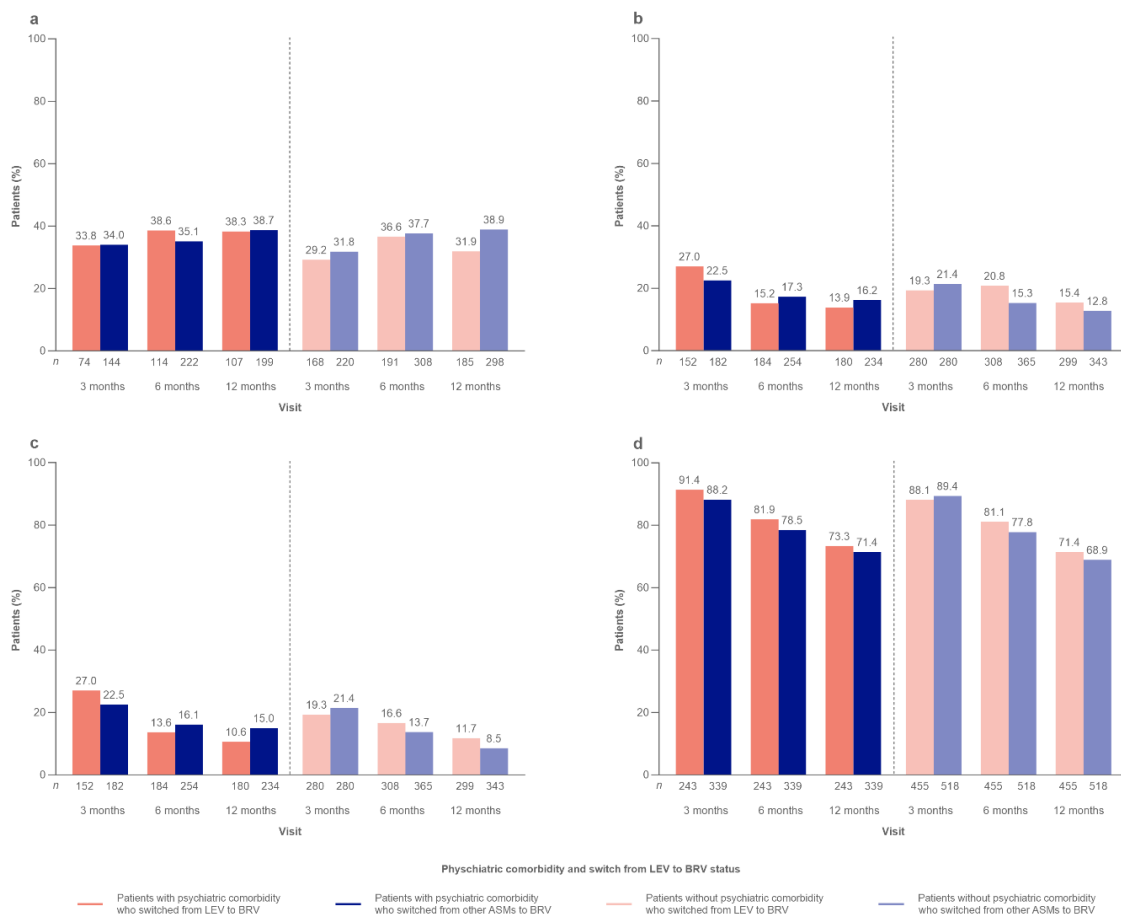

**Supplementary Fig. S2** Analyses of effectiveness for patients with focal-onset seizures and a BRV dose of  $\leq 200$  mg/day used as add-on at index, by comorbidity (patients with/without CLD and patients with/without psychiatric comorbidity) at baseline: **(a)**  $\geq 50\%$  seizure reduction (*mFAS*), **(b)** seizure freedom (*FAS*), **(c)** continuous seizure freedom (*FAS*), and **(d)** BRV retention (*FAS*). *n* represents the number of patients with data for the reported variable at each visit. Patients with missing data were excluded from all seizure analyses. Patients with missing data after BRV discontinuation were considered non-responders and not seizure free. *BRV* brivaracetam, *CLD* cognitive/learning disability, *FAS* full analysis set, *mFAS* modified full analysis set

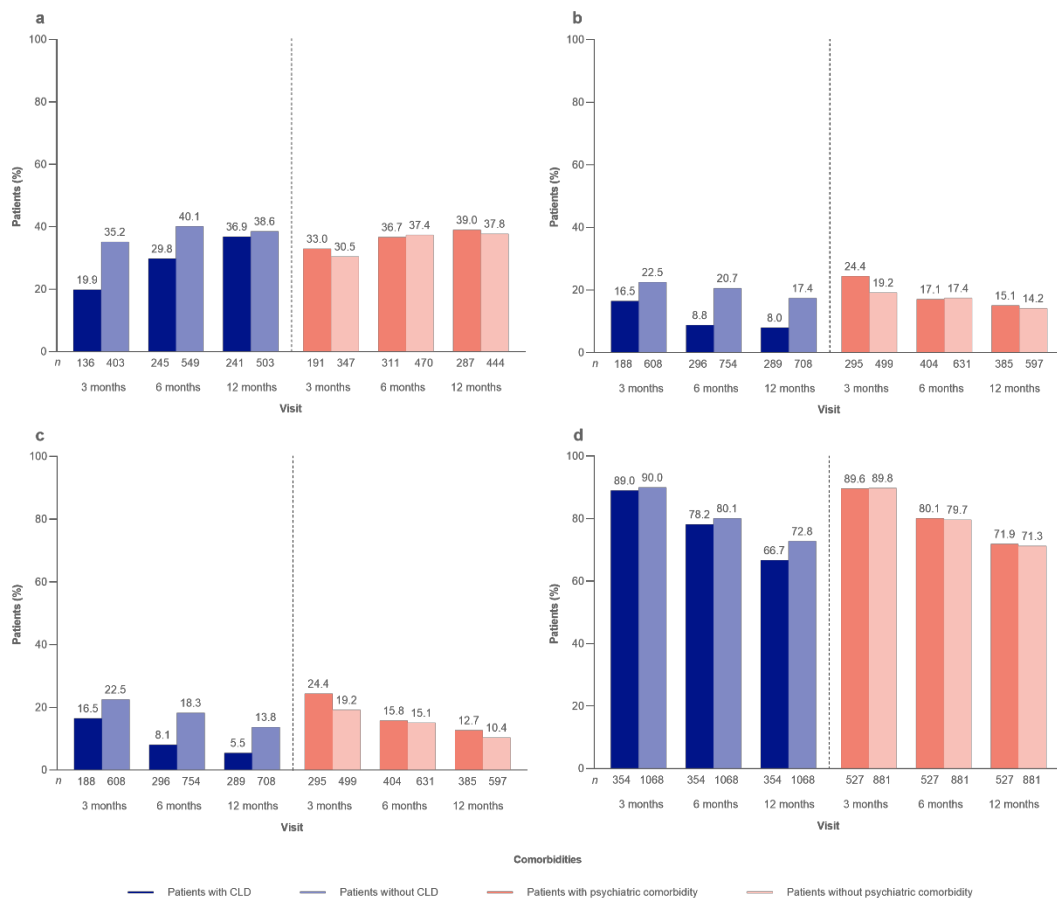

**Supplementary Fig. S3** Analyses of effectiveness for patients with focal-onset seizures and a BRV dose of  $\leq 200$  mg/day used as add-on at index, by etiology (patients with/without post-stroke epilepsy, patients with/without BTRE, and patients with/without TBIE) at baseline: **(a)**  $\geq 50\%$  seizure reduction (*mFAS*), **(b)** seizure freedom (*FAS*), **(c)** continuous seizure freedom (*FAS*), and **(d)** BRV retention (*FAS*). *n* represents the number of patients with data for the reported variable at each visit. Patients with missing data were excluded from all seizure analyses. Patients with missing data after BRV discontinuation were considered non-responders and not seizure free. *BRV* brivaracetam, *BTRE* brain tumor–related epilepsy, *FAS* full analysis set, *mFAS* modified full analysis set, *TBIE* traumatic brain injury–related epilepsy

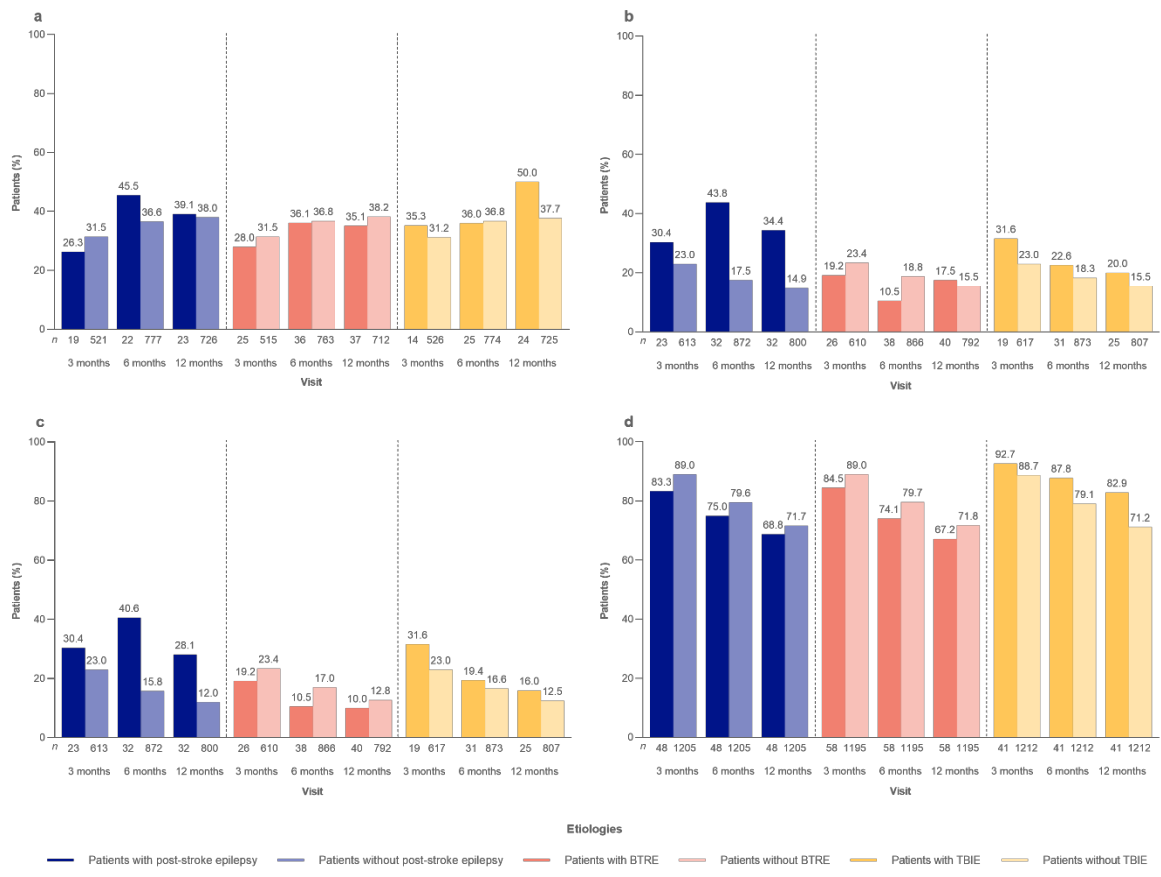

Supplement: 415_2024_12253_MOESM1_ESM.pdf [file 415_2024_12253_MOESM1_ESM.pdf]
